# Supplementary material for: Experimental Acute Exposure to Thirdhand Smoke and Changes in the Human Nasal Epithelial Transcriptome: A Randomized Clinical Trial
Source: PubMed Central journal article supplement (PMC6604097; doi:10.1001/jamanetworkopen.2019.6362), 2019-06-28
Supplement: jamanetwopen-2-e196362-s002.pdf [file jamanetwopen-2-e196362-s002.pdf]

## Supplementary Online Content

Pozuelos GL, Kagda MS, Schick S, Girke T, Volz DC, Talbot P. Experimental acute exposure to thirdhand smoke and changes in the human nasal epithelial transcriptome: a randomized clinical trial. *JAMA Netw Open*. 2019;2(6):e196362. doi:10.1001/jamanetworkopen.2019.6362

**eFigure 1.** Experimental Design for Clean Air and THS Exposure

**eTable 1.** Number of Differentially Expressed Genes (DEGs) for Clean Air and THS Exposure

**eFigure 2.** Volcano Plots Showing the DEGs After Clean Air or THS Exposure

**eTable 2.** Log<sub>2</sub>-Fold Change, *P*-Values, and FDR Values, and of DEGs After Clean Air Exposure

**eTable 3.** Log<sub>2</sub>-Fold Change, *P*-Values, and FDR Values and of DEGs After THS Exposure

**eTable 4.** GO Terms: Biological Processes Enriched After THS Exposure

**eTable 5.** GO Terms: Cellular Components Enriched After THS Exposure

**eTable 6.** GO Terms: Molecular Function Enriched After THS Exposure

**eTable 7.** Reactome Terms Enriched After THS Exposure

**eFigure 3.** Diagram Showing the Cell Death Associated Genes That Were Upregulated Following THS Exposure in the IPA Analysis

**eFigure 4.** Diagram Showing the Cell Viability Genes That Were Upregulated Following THS Exposure in the IPA Analysis

**eFigure 5.** Diagram Showing the Homologous Recombination Genes That Were Upregulated Following THS Exposure in the IPA Analysis

**eReferences**

This supplementary material has been provided by the authors to give readers additional information about their work.

**eFigure 1. Experimental Design for Clean Air and THS Exposure.** Schematic diagram illustrating experimental design in which nasal scrapes were taken before and after exposure to either clean air (A) or THS (B) after a 3 hour exposure.

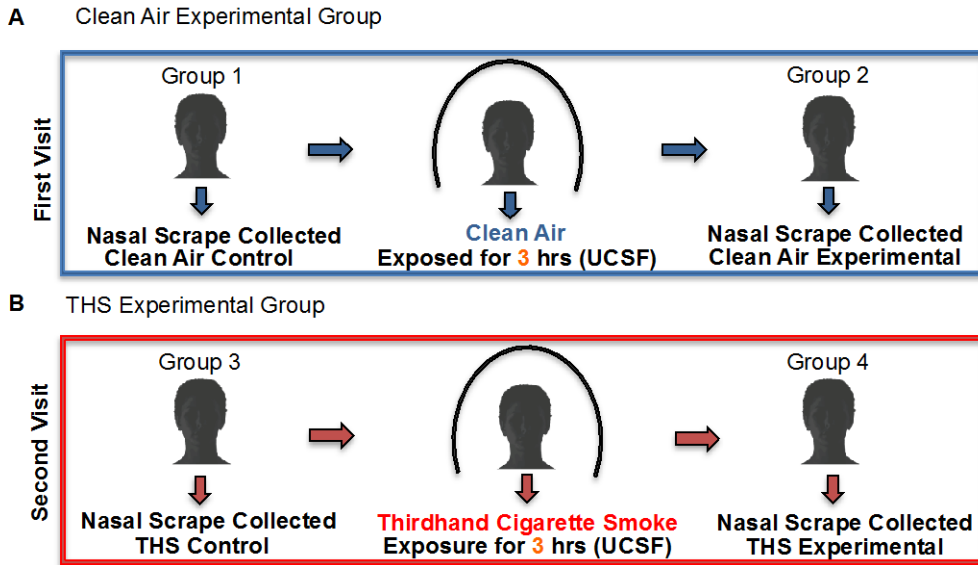

**eTable 1. Number of Differentially Expressed Genes (DEGs) for Clean Air and THS Exposure.**

|                    | Down Regulated DEGs | Up-Regulated DEGs |
|--------------------|---------------------|-------------------|
| Clean Air Exposure | 0                   | 2                 |
| THS Exposure       | 7                   | 382               |

**eFigure 2. Volcano Plots Showing the DEGs After Clean Air or THS Exposure.**

(A) DEGs following clean air exposure and (B) following THS exposure. Blue dots represent genes that were not significant (FDR > 0.1), and magenta dots represent DEGs (FDR < 0.1).

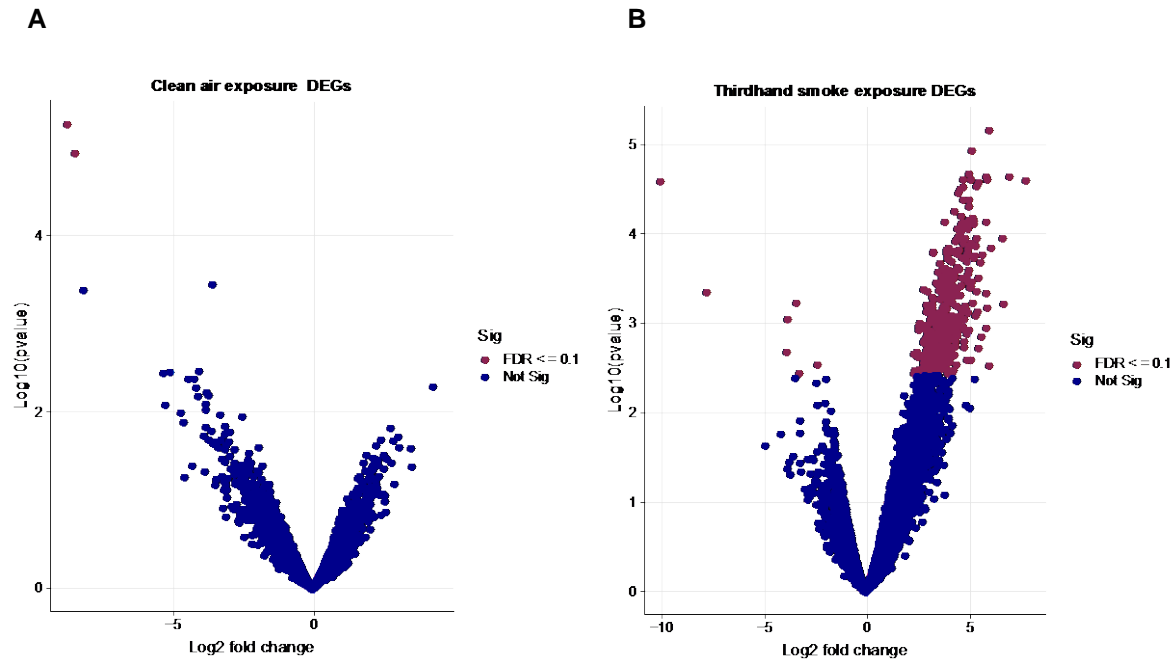

**eTable 2. Log<sub>2</sub>-Fold Change, P-Values, and FDR Values, and of DEGs After Clean Air Exposure.**

| Genes | Log <sub>2</sub> -Fold Change | P-Value  | FDR  |
|-------|-------------------------------|----------|------|
| HBA2  | -8.71                         | 5.38E-06 | 0.06 |
| HBA1  | -8.41                         | 1.13E-05 | 0.06 |

**eTable 3. Log<sub>2</sub>-Fold Change, P-Values, and FDR values and of DEGs After THS Exposure.**

| <b>Genes</b> | <b>Log<sub>2</sub>-Fold Change</b> | <b>P-Value</b> | <b>FDR</b> |
|--------------|------------------------------------|----------------|------------|
| ANAPC11      | 5.00                               | 2.06E-05       | 0.02       |
| CIB1         | 5.16                               | 1.14E-05       | 0.02       |
| COMT         | 4.61                               | 3.07E-05       | 0.02       |
| COPE         | 5.10                               | 2.40E-05       | 0.02       |
| ECH1         | 4.75                               | 2.92E-05       | 0.02       |
| HBG1         | -9.96                              | 2.54E-05       | 0.02       |
| MAN1B1       | 6.02                               | 6.83E-06       | 0.02       |
| OSM          | 7.78                               | 2.49E-05       | 0.02       |
| PHPT1        | 5.47                               | 2.61E-05       | 0.02       |
| PPP5C        | 5.92                               | 2.43E-05       | 0.02       |
| TCEB2        | 4.76                               | 2.39E-05       | 0.02       |
| TFF3         | 7.01                               | 2.25E-05       | 0.02       |
| TMEM190      | 5.88                               | 2.24E-05       | 0.02       |
| ZMYND10      | 5.39                               | 2.84E-05       | 0.02       |
| ALDOA        | 4.52                               | 3.43E-05       | 0.02       |
| BRMS1        | 5.03                               | 4.06E-05       | 0.03       |
| PPP1CA       | 4.72                               | 4.05E-05       | 0.03       |
| AGTRAP       | 4.99                               | 7.33E-05       | 0.03       |
| ASL          | 5.14                               | 7.25E-05       | 0.03       |
| C19orf70     | 5.24                               | 7.05E-05       | 0.03       |
| NDUFV1       | 5.03                               | 6.85E-05       | 0.03       |
| PMPCA        | 5.87                               | 7.29E-05       | 0.03       |
| POLD2        | 5.21                               | 6.53E-05       | 0.03       |
| POLR2E       | 4.77                               | 7.47E-05       | 0.03       |
| POLR2I       | 4.65                               | 7.55E-05       | 0.03       |
| POLR2L       | 4.67                               | 6.28E-05       | 0.03       |
| R3HCC1       | 5.27                               | 7.63E-05       | 0.03       |
| ROMO1        | 4.31                               | 5.46E-05       | 0.03       |
| SNRPB        | 3.86                               | 7.16E-05       | 0.03       |
| TPPP3        | 5.04                               | 4.82E-05       | 0.03       |
| BSG          | 3.95                               | 1.61E-04       | 0.03       |
| BUD31        | 3.95                               | 1.49E-04       | 0.03       |
| C16orf71     | 4.96                               | 1.43E-04       | 0.03       |
| CCDC101      | 5.22                               | 1.32E-04       | 0.03       |
| CD151        | 4.03                               | 1.43E-04       | 0.03       |
| CENPM        | 6.64                               | 1.09E-04       | 0.03       |
| CFL1         | 3.28                               | 1.59E-04       | 0.03       |
| CHID1        | 4.76                               | 1.25E-04       | 0.03       |
| COMMD4       | 4.46                               | 1.62E-04       | 0.03       |
| DDX39A       | 4.95                               | 1.67E-04       | 0.03       |
| ETFB         | 4.45                               | 8.69E-05       | 0.03       |
| EXOSC5       | 6.12                               | 1.43E-04       | 0.03       |
| GPS1         | 4.99                               | 1.63E-04       | 0.03       |
| LGALS1       | 4.91                               | 1.62E-04       | 0.03       |
| MGMT         | 4.74                               | 8.28E-05       | 0.03       |
| MRPL28       | 4.99                               | 8.66E-05       | 0.03       |
| MVP          | 4.06                               | 1.41E-04       | 0.03       |
| NDUFA11      | 4.73                               | 1.13E-04       | 0.03       |
| NOC2L        | 5.35                               | 1.34E-04       | 0.03       |

| <b>Genes</b> | <b>Log<sub>2</sub> -Fold Change</b> | <b>P-Value</b> | <b>FDR</b> |
|--------------|-------------------------------------|----------------|------------|
| OTUB1        | 4.28                                | 1.52E-04       | 0.03       |
| PMEL         | 5.68                                | 1.69E-04       | 0.03       |
| PMF1-BGLAP   | 5.13                                | 1.25E-04       | 0.03       |
| PRPF6        | 4.39                                | 1.17E-04       | 0.03       |
| PTCD1        | 4.37                                | 1.59E-04       | 0.03       |
| RPL18        | 4.56                                | 1.03E-04       | 0.03       |
| SCRN2        | 5.29                                | 1.70E-04       | 0.03       |
| STRA13       | 4.53                                | 1.50E-04       | 0.03       |
| TARBP2       | 4.82                                | 1.10E-04       | 0.03       |
| TCF25        | 4.44                                | 1.11E-04       | 0.03       |
| TMEM265      | 3.29                                | 1.56E-04       | 0.03       |
| TOM1         | 4.31                                | 1.55E-04       | 0.03       |
| TRAPPC6A     | 5.00                                | 1.33E-04       | 0.03       |
| TSTA3        | 5.39                                | 1.11E-04       | 0.03       |
| VPS28        | 4.64                                | 9.25E-05       | 0.03       |
| WBP2         | 4.09                                | 1.55E-04       | 0.03       |
| ADGRE5       | 3.99                                | 1.83E-04       | 0.03       |
| ARL2         | 5.27                                | 1.80E-04       | 0.03       |
| C12orf57     | 4.71                                | 1.83E-04       | 0.03       |
| MAGED2       | 3.99                                | 1.83E-04       | 0.03       |
| SCAMP2       | 4.17                                | 2.00E-04       | 0.03       |
| SSSCA1       | 4.93                                | 2.00E-04       | 0.03       |
| CLK3         | 5.60                                | 2.04E-04       | 0.03       |
| WWP2         | 3.63                                | 2.11E-04       | 0.03       |
| AP2S1        | 4.43                                | 2.30E-04       | 0.03       |
| IDH3G        | 4.55                                | 2.40E-04       | 0.03       |
| KAT5         | 4.42                                | 2.41E-04       | 0.03       |
| LYPD2        | 3.84                                | 2.39E-04       | 0.03       |
| VMO1         | 3.76                                | 2.41E-04       | 0.03       |
| NHP2         | 4.06                                | 2.50E-04       | 0.03       |
| NRBP1        | 3.95                                | 2.48E-04       | 0.03       |
| TBRG4        | 5.00                                | 2.53E-04       | 0.03       |
| OAZ1         | 3.51                                | 2.65E-04       | 0.03       |
| PCIF1        | 4.34                                | 2.68E-04       | 0.03       |
| TEN1         | 4.98                                | 2.73E-04       | 0.03       |
| MTX1         | 4.05                                | 2.77E-04       | 0.04       |
| AAMP         | 3.81                                | 2.99E-04       | 0.04       |
| ARPC4        | 3.86                                | 2.90E-04       | 0.04       |
| CD82         | 3.71                                | 2.99E-04       | 0.04       |
| CDC42EP2     | 4.90                                | 3.10E-04       | 0.04       |
| MRPS11       | 4.26                                | 3.11E-04       | 0.04       |
| NDUFB7       | 4.34                                | 2.96E-04       | 0.04       |
| NDUFS8       | 4.14                                | 2.94E-04       | 0.04       |
| TEN1-CDK3    | 4.92                                | 3.08E-04       | 0.04       |
| YIPF2        | 4.71                                | 3.07E-04       | 0.04       |
| ZBTB48       | 5.47                                | 3.08E-04       | 0.04       |
| C19orf33     | 3.53                                | 3.58E-04       | 0.04       |
| CCDC103      | 4.13                                | 3.50E-04       | 0.04       |
| CRIP1        | 3.98                                | 3.52E-04       | 0.04       |
| KRT8         | 3.69                                | 3.55E-04       | 0.04       |
| LGALS3BP     | 3.77                                | 3.48E-04       | 0.04       |
| LINC00116    | 5.14                                | 3.39E-04       | 0.04       |

| <b>Genes</b>    | <b>Log<sub>2</sub> -Fold Change</b> | <b>P-Value</b> | <b>FDR</b> |
|-----------------|-------------------------------------|----------------|------------|
| MT2A            | 4.10                                | 3.29E-04       | 0.04       |
| PPAP2C          | 3.56                                | 3.43E-04       | 0.04       |
| WDR25           | 4.98                                | 3.34E-04       | 0.04       |
| YIF1B           | 3.44                                | 3.48E-04       | 0.04       |
| NAPA            | 4.00                                | 3.66E-04       | 0.04       |
| ALOX15P1        | 5.13                                | 3.81E-04       | 0.04       |
| GMPPA           | 4.67                                | 3.75E-04       | 0.04       |
| LMAN2           | 4.00                                | 3.84E-04       | 0.04       |
| SGSM3           | 4.26                                | 3.77E-04       | 0.04       |
| BCKDHA          | 4.45                                | 3.96E-04       | 0.04       |
| PRMT7           | 5.05                                | 3.93E-04       | 0.04       |
| PRSS8           | 4.26                                | 3.99E-04       | 0.04       |
| RPL28           | 3.88                                | 4.02E-04       | 0.04       |
| UBAC2           | 3.90                                | 3.99E-04       | 0.04       |
| FTSJ1           | 2.81                                | 4.06E-04       | 0.04       |
| ACO2            | 3.73                                | 4.32E-04       | 0.04       |
| C12orf10        | 4.38                                | 4.22E-04       | 0.04       |
| DPM3            | 5.39                                | 4.27E-04       | 0.04       |
| LYPLA2          | 4.13                                | 4.31E-04       | 0.04       |
| NDUFC2-KCTD14   | 3.00                                | 4.32E-04       | 0.04       |
| UBL7            | 4.25                                | 4.15E-04       | 0.04       |
| ZNHIT1          | 3.58                                | 4.24E-04       | 0.04       |
| ENTPD6          | 4.35                                | 4.43E-04       | 0.04       |
| HBG2            | -7.74                               | 4.44E-04       | 0.04       |
| PMF1            | 4.07                                | 4.38E-04       | 0.04       |
| MIR4761         | 5.87                                | 4.50E-04       | 0.04       |
| ASCC2           | 3.93                                | 4.85E-04       | 0.04       |
| CHCHD5          | 4.59                                | 4.72E-04       | 0.04       |
| KIAA0195        | 4.09                                | 4.83E-04       | 0.04       |
| RUVBL1          | 3.75                                | 4.75E-04       | 0.04       |
| ZMAT5           | 4.47                                | 4.78E-04       | 0.04       |
| TIMM13          | 4.05                                | 4.93E-04       | 0.04       |
| PIGT            | 3.24                                | 5.03E-04       | 0.04       |
| ISG20           | 4.10                                | 5.26E-04       | 0.04       |
| TMEM205         | 3.85                                | 5.14E-04       | 0.04       |
| TNFSF12-TNFSF13 | 3.64                                | 5.23E-04       | 0.04       |
| TNFSF13         | 3.30                                | 5.20E-04       | 0.04       |
| RPP21           | 4.19                                | 5.30E-04       | 0.04       |
| ADGRG6          | -3.36                               | 5.74E-04       | 0.04       |
| PEX16           | 5.20                                | 5.81E-04       | 0.04       |
| SCAMP3          | 4.24                                | 5.81E-04       | 0.04       |
| ST3GAL4-AS1     | 6.70                                | 5.89E-04       | 0.04       |
| GALE            | 3.82                                | 6.18E-04       | 0.04       |
| HIGD2A          | 3.18                                | 6.12E-04       | 0.04       |
| HN1             | 3.26                                | 6.12E-04       | 0.04       |
| NDUFB2          | 2.94                                | 6.15E-04       | 0.04       |
| SLC35C2         | 3.91                                | 6.06E-04       | 0.04       |
| WRAP53          | 4.40                                | 6.18E-04       | 0.04       |
| CATSPERD        | 4.84                                | 6.27E-04       | 0.04       |
| USP11           | 3.79                                | 6.40E-04       | 0.05       |
| ABHD11-AS1      | 5.90                                | 6.63E-04       | 0.05       |
| ARPC4-TTLL3     | 3.85                                | 6.68E-04       | 0.05       |

| <b>Genes</b>  | <b>Log<sub>2</sub> -Fold Change</b> | <b>P-Value</b> | <b>FDR</b> |
|---------------|-------------------------------------|----------------|------------|
| CLN3          | 3.75                                | 6.76E-04       | 0.05       |
| CNN2          | 3.74                                | 6.51E-04       | 0.05       |
| DCPS          | 3.87                                | 6.74E-04       | 0.05       |
| SIL1          | 3.93                                | 6.66E-04       | 0.05       |
| TAX1BP3       | 3.25                                | 6.64E-04       | 0.05       |
| TSSC4         | 4.63                                | 6.74E-04       | 0.05       |
| DDX49         | 4.90                                | 6.87E-04       | 0.05       |
| HIST1H2BC     | 4.69                                | 7.19E-04       | 0.05       |
| H3F3C         | 2.94                                | 7.30E-04       | 0.05       |
| SDSL          | 5.46                                | 7.32E-04       | 0.05       |
| RPL18A        | 3.58                                | 7.40E-04       | 0.05       |
| CHCHD6        | 4.96                                | 7.48E-04       | 0.05       |
| GSS           | 3.18                                | 7.60E-04       | 0.05       |
| LRG1          | 3.31                                | 7.60E-04       | 0.05       |
| TEX264        | 3.85                                | 7.86E-04       | 0.05       |
| MEF2BNB-MEF2B | 5.35                                | 7.95E-04       | 0.05       |
| TIMM17B       | 4.17                                | 8.12E-04       | 0.05       |
| VPS39         | 3.74                                | 8.09E-04       | 0.05       |
| PAFAH1B3      | 4.43                                | 8.26E-04       | 0.05       |
| PARP3         | 3.42                                | 8.24E-04       | 0.05       |
| PCNA-AS1      | 4.64                                | 8.34E-04       | 0.05       |
| SNAP47        | 3.64                                | 8.33E-04       | 0.05       |
| ANAPC5        | 3.21                                | 8.39E-04       | 0.05       |
| NANS          | 3.22                                | 8.57E-04       | 0.05       |
| TADA3         | 3.39                                | 8.65E-04       | 0.05       |
| USB1          | 3.52                                | 8.62E-04       | 0.05       |
| CYB561A3      | 3.37                                | 8.79E-04       | 0.05       |
| RPL36         | 3.14                                | 8.79E-04       | 0.05       |
| TEKT2         | 4.78                                | 8.85E-04       | 0.05       |
| LINC01224     | -3.78                               | 8.93E-04       | 0.05       |
| RPP25L        | 4.31                                | 9.00E-04       | 0.05       |
| ANKZF1        | 3.96                                | 9.13E-04       | 0.05       |
| CHI3L1        | 3.65                                | 9.19E-04       | 0.05       |
| GPR162        | 3.77                                | 9.21E-04       | 0.05       |
| GSTP1         | 3.66                                | 9.06E-04       | 0.05       |
| AEN           | 4.22                                | 9.46E-04       | 0.05       |
| CXXC1         | 4.53                                | 9.47E-04       | 0.05       |
| DNAL4         | 3.91                                | 9.40E-04       | 0.05       |
| LSP1          | 4.10                                | 9.47E-04       | 0.05       |
| SIRT2         | 3.73                                | 9.45E-04       | 0.05       |
| ARF1          | 3.17                                | 9.54E-04       | 0.05       |
| EWSR1         | 2.62                                | 9.69E-04       | 0.05       |
| NARF          | 3.97                                | 9.72E-04       | 0.05       |
| SF3B4         | 3.50                                | 9.68E-04       | 0.05       |
| ST3GAL4       | 3.42                                | 9.87E-04       | 0.05       |
| RAD9A         | 3.93                                | 1.00E-03       | 0.05       |
| EIF4H         | 2.89                                | 1.03E-03       | 0.06       |
| ALG12         | 4.46                                | 1.06E-03       | 0.06       |
| NDUFC2        | 2.56                                | 1.06E-03       | 0.06       |
| RSPH9         | 3.86                                | 1.06E-03       | 0.06       |
| TUBG1         | 3.40                                | 1.04E-03       | 0.06       |
| CCDC57        | 4.73                                | 1.08E-03       | 0.06       |

| <b>Genes</b> | <b>Log<sub>2</sub> -Fold Change</b> | <b>P-Value</b> | <b>FDR</b> |
|--------------|-------------------------------------|----------------|------------|
| DUOXA1       | 3.49                                | 1.09E-03       | 0.06       |
| LOC105447645 | 4.26                                | 1.09E-03       | 0.06       |
| TECR         | 3.87                                | 1.09E-03       | 0.06       |
| TMED1        | 4.38                                | 1.09E-03       | 0.06       |
| ACOT8        | 4.33                                | 1.12E-03       | 0.06       |
| CDK10        | 5.85                                | 1.11E-03       | 0.06       |
| NDUFB2-AS1   | 4.20                                | 1.12E-03       | 0.06       |
| LRRC46       | 3.58                                | 1.13E-03       | 0.06       |
| AP4M1        | 4.02                                | 1.15E-03       | 0.06       |
| HIST2H4A     | 5.03                                | 1.15E-03       | 0.06       |
| HIST2H4B     | 5.03                                | 1.15E-03       | 0.06       |
| SEC61B       | 2.58                                | 1.16E-03       | 0.06       |
| SNCG         | 4.82                                | 1.17E-03       | 0.06       |
| U2AF1        | 2.86                                | 1.14E-03       | 0.06       |
| UQCR11       | 3.04                                | 1.16E-03       | 0.06       |
| STK36        | 3.58                                | 1.18E-03       | 0.06       |
| PPP1R32      | 4.89                                | 1.19E-03       | 0.06       |
| MUC20        | 3.15                                | 1.19E-03       | 0.06       |
| FAM195B      | 4.45                                | 1.21E-03       | 0.06       |
| ANPEP        | 3.26                                | 1.26E-03       | 0.06       |
| DMAP1        | 4.46                                | 1.25E-03       | 0.06       |
| IFI30        | 3.12                                | 1.27E-03       | 0.06       |
| NCF4         | 3.85                                | 1.25E-03       | 0.06       |
| NOL12        | 4.35                                | 1.27E-03       | 0.06       |
| C11orf49     | 3.23                                | 1.28E-03       | 0.06       |
| CCDC159      | 4.91                                | 1.28E-03       | 0.06       |
| C6orf1       | 4.03                                | 1.29E-03       | 0.06       |
| XRCC1        | 3.90                                | 1.30E-03       | 0.06       |
| DNPEP        | 2.99                                | 1.31E-03       | 0.06       |
| RAB5C        | 3.13                                | 1.31E-03       | 0.06       |
| ABHD16A      | 3.19                                | 1.34E-03       | 0.06       |
| C19orf48     | 4.46                                | 1.34E-03       | 0.06       |
| ELOF1        | 3.94                                | 1.41E-03       | 0.06       |
| GPX3         | 3.52                                | 1.41E-03       | 0.06       |
| HEXA         | 3.41                                | 1.39E-03       | 0.06       |
| LYPLA2P2     | 5.64                                | 1.38E-03       | 0.06       |
| PPARD        | 3.65                                | 1.38E-03       | 0.06       |
| RAD23A       | 3.23                                | 1.41E-03       | 0.06       |
| SLC16A5      | 3.27                                | 1.39E-03       | 0.06       |
| TAPBPL       | 3.51                                | 1.40E-03       | 0.06       |
| TBCD         | 3.95                                | 1.38E-03       | 0.06       |
| AK1          | 3.87                                | 1.44E-03       | 0.06       |
| CINP         | 4.26                                | 1.44E-03       | 0.06       |
| PPP2R1A      | 3.24                                | 1.45E-03       | 0.06       |
| RPS5         | 3.21                                | 1.45E-03       | 0.06       |
| XPC          | 3.25                                | 1.43E-03       | 0.06       |
| GCHFR        | 3.87                                | 1.46E-03       | 0.06       |
| MX1          | 2.93                                | 1.46E-03       | 0.06       |
| LAPTM5       | 3.08                                | 1.47E-03       | 0.06       |
| BIN3         | 3.65                                | 1.50E-03       | 0.06       |
| ARAF         | 3.36                                | 1.53E-03       | 0.06       |
| FLOT2        | 3.27                                | 1.53E-03       | 0.06       |



| <b>Genes</b>   | <b>Log<sub>2</sub> -Fold Change</b> | <b>P-Value</b> | <b>FDR</b> |
|----------------|-------------------------------------|----------------|------------|
| BSCL2          | 3.39                                | 1.54E-03       | 0.06       |
| GAS8           | 3.85                                | 1.55E-03       | 0.06       |
| GPRC5C         | 3.26                                | 1.57E-03       | 0.06       |
| HS1BP3         | 4.78                                | 1.58E-03       | 0.06       |
| MLST8          | 4.01                                | 1.56E-03       | 0.06       |
| P2RX5-TAX1BP3  | 2.84                                | 1.57E-03       | 0.06       |
| ZNF576         | 4.35                                | 1.56E-03       | 0.06       |
| COX8A          | 2.80                                | 1.60E-03       | 0.06       |
| GRIPAP1        | 3.00                                | 1.61E-03       | 0.06       |
| NADSYN1        | 3.81                                | 1.64E-03       | 0.07       |
| NCAPH2         | 3.79                                | 1.65E-03       | 0.07       |
| SZRD1          | 3.16                                | 1.65E-03       | 0.07       |
| CYP2F1         | 3.07                                | 1.69E-03       | 0.07       |
| DDX41          | 3.77                                | 1.69E-03       | 0.07       |
| PHGDH          | 3.74                                | 1.68E-03       | 0.07       |
| SPTAN1         | 3.11                                | 1.72E-03       | 0.07       |
| STK11IP        | 4.38                                | 1.77E-03       | 0.07       |
| CARKD          | 3.27                                | 1.78E-03       | 0.07       |
| MUL1           | 3.57                                | 1.79E-03       | 0.07       |
| CCS            | 4.77                                | 1.80E-03       | 0.07       |
| KIF22          | 4.15                                | 1.82E-03       | 0.07       |
| MED24          | 3.37                                | 1.82E-03       | 0.07       |
| CDC37          | 3.63                                | 1.83E-03       | 0.07       |
| WFDC2          | 3.18                                | 1.83E-03       | 0.07       |
| BCL2L1         | 3.18                                | 1.87E-03       | 0.07       |
| C9orf114       | 3.54                                | 1.87E-03       | 0.07       |
| MFAP2          | 5.50                                | 1.85E-03       | 0.07       |
| RPL29          | 3.05                                | 1.86E-03       | 0.07       |
| ZDHHC12        | 4.11                                | 1.86E-03       | 0.07       |
| CPSF3L         | 3.84                                | 1.88E-03       | 0.07       |
| RPS9           | 3.14                                | 1.88E-03       | 0.07       |
| WDR55          | 3.11                                | 1.90E-03       | 0.07       |
| RABGGTA        | 3.54                                | 1.92E-03       | 0.07       |
| BLVRB          | 3.38                                | 1.93E-03       | 0.07       |
| DAGLB          | 4.13                                | 1.94E-03       | 0.07       |
| PHB            | 3.21                                | 1.94E-03       | 0.07       |
| HNRNPUL2-BSCL2 | 3.28                                | 1.95E-03       | 0.07       |
| ARHGAP1        | 2.97                                | 1.97E-03       | 0.07       |
| EXOC7          | 2.98                                | 1.98E-03       | 0.07       |
| TREX1          | 3.80                                | 1.98E-03       | 0.07       |
| MRPL53         | 4.09                                | 2.00E-03       | 0.07       |
| PRKCSH         | 3.60                                | 2.00E-03       | 0.07       |
| LOC101928223   | -3.83                               | 2.04E-03       | 0.07       |
| GSTO1          | 2.48                                | 2.04E-03       | 0.07       |
| NUP188         | 4.19                                | 2.08E-03       | 0.07       |
| MRPL52         | 3.17                                | 2.11E-03       | 0.07       |
| TIMM10B        | 2.50                                | 2.13E-03       | 0.08       |
| MRPL55         | 3.56                                | 2.15E-03       | 0.08       |
| NTMT1          | 3.81                                | 2.16E-03       | 0.08       |
| PLEKHJ1        | 3.76                                | 2.16E-03       | 0.08       |
| SGTA           | 3.99                                | 2.17E-03       | 0.08       |
| CCDC37         | 3.64                                | 2.18E-03       | 0.08       |

| <b>Genes</b> | <b>Log<sub>2</sub> -Fold Change</b> | <b>P-Value</b> | <b>FDR</b> |
|--------------|-------------------------------------|----------------|------------|
| RBM23        | 2.34                                | 2.19E-03       | 0.08       |
| WDR45        | 3.31                                | 2.21E-03       | 0.08       |
| GPATCH3      | 4.21                                | 2.24E-03       | 0.08       |
| SRA1         | 2.76                                | 2.24E-03       | 0.08       |
| TFPT         | 4.32                                | 2.24E-03       | 0.08       |
| ITFG3        | 4.05                                | 2.26E-03       | 0.08       |
| LRPAP1       | 3.30                                | 2.27E-03       | 0.08       |
| NAP1L4       | 2.74                                | 2.27E-03       | 0.08       |
| COASY        | 3.33                                | 2.32E-03       | 0.08       |
| HLA-E        | 2.55                                | 2.31E-03       | 0.08       |
| URM1         | 3.36                                | 2.32E-03       | 0.08       |
| ARL16        | 3.13                                | 2.36E-03       | 0.08       |
| RNASEH2C     | 3.24                                | 2.38E-03       | 0.08       |
| DPP3         | 2.95                                | 2.41E-03       | 0.08       |
| ST20         | 3.93                                | 2.41E-03       | 0.08       |
| MSRB1        | 3.28                                | 2.44E-03       | 0.08       |
| ACY1         | 3.77                                | 2.49E-03       | 0.08       |
| LENG1        | 4.94                                | 2.49E-03       | 0.08       |
| RRP12        | 4.11                                | 2.50E-03       | 0.08       |
| ABHD14A-ACY1 | 3.69                                | 2.54E-03       | 0.08       |
| CLCNKB       | 5.10                                | 2.53E-03       | 0.08       |
| CXCL8        | 3.41                                | 2.52E-03       | 0.08       |
| EEF1D        | 3.07                                | 2.54E-03       | 0.08       |
| KRT17        | 3.25                                | 2.52E-03       | 0.08       |
| COG7         | 3.26                                | 2.63E-03       | 0.08       |
| DCP1B        | 3.56                                | 2.63E-03       | 0.08       |
| HMBS         | 3.45                                | 2.61E-03       | 0.08       |
| LOC102724814 | 3.90                                | 2.61E-03       | 0.08       |
| PDZK1IP1     | 3.71                                | 2.62E-03       | 0.08       |
| SARS2        | 4.06                                | 2.62E-03       | 0.08       |
| VSIG2        | 3.01                                | 2.59E-03       | 0.08       |
| WDR86-AS1    | 3.35                                | 2.63E-03       | 0.08       |
| POMT1        | 4.06                                | 2.64E-03       | 0.08       |
| LAMTOR4      | 3.35                                | 2.66E-03       | 0.08       |
| ZER1         | 3.17                                | 2.68E-03       | 0.08       |
| ABT1         | 3.06                                | 2.70E-03       | 0.08       |
| GLIPR2       | 2.82                                | 2.71E-03       | 0.08       |
| PSMG3        | 2.84                                | 2.71E-03       | 0.08       |
| PRMT1        | 3.43                                | 2.75E-03       | 0.08       |
| LIN37        | 4.43                                | 2.85E-03       | 0.09       |
| MMP3         | -2.32                               | 2.85E-03       | 0.09       |
| SSNA1        | 3.45                                | 2.85E-03       | 0.09       |
| TXLNA        | 3.09                                | 2.85E-03       | 0.09       |
| DRG2         | 3.80                                | 2.91E-03       | 0.09       |
| EMP3         | 5.98                                | 2.95E-03       | 0.09       |
| NFYC         | 3.03                                | 3.03E-03       | 0.09       |
| SLC25A11     | 2.88                                | 3.05E-03       | 0.09       |
| POLR3H       | 2.87                                | 3.08E-03       | 0.09       |
| SLC44A4      | 3.11                                | 3.10E-03       | 0.09       |
| EIF3C        | 2.77                                | 3.11E-03       | 0.09       |
| EIF3CL       | 2.77                                | 3.12E-03       | 0.09       |
| THAP3        | 3.70                                | 3.16E-03       | 0.09       |

| Genes    | Log <sub>2</sub> -Fold Change | P-Value  | FDR  |
|----------|-------------------------------|----------|------|
| BCL2A1   | 2.92                          | 3.19E-03 | 0.09 |
| CABP7    | 3.92                          | 3.21E-03 | 0.09 |
| DIABLO   | 2.62                          | 3.21E-03 | 0.09 |
| PISD     | 2.66                          | 3.23E-03 | 0.09 |
| SLC35A4  | 3.28                          | 3.23E-03 | 0.09 |
| CRELD1   | 4.08                          | 3.26E-03 | 0.10 |
| ABTB1    | 4.25                          | 3.28E-03 | 0.10 |
| ARFGAP2  | 3.35                          | 3.31E-03 | 0.10 |
| EIF3G    | 3.50                          | 3.31E-03 | 0.10 |
| SERPINF1 | 3.07                          | 3.30E-03 | 0.10 |
| UQCRQ    | 2.41                          | 3.30E-03 | 0.10 |
| COA3     | 2.56                          | 3.39E-03 | 0.10 |
| FBXO6    | 3.44                          | 3.39E-03 | 0.10 |
| NEU1     | 2.45                          | 3.39E-03 | 0.10 |
| PSMB10   | 2.86                          | 3.36E-03 | 0.10 |
| TPD52L2  | 3.33                          | 3.39E-03 | 0.10 |
| ZFYVE19  | 3.49                          | 3.42E-03 | 0.10 |
| TMEM219  | 2.70                          | 3.46E-03 | 0.10 |
| HCK      | 4.24                          | 3.48E-03 | 0.10 |
| C3orf30  | -3.23                         | 3.53E-03 | 0.10 |
| IFI27L2  | 3.39                          | 3.53E-03 | 0.10 |
| TMEM9    | 3.02                          | 3.54E-03 | 0.10 |
| LGALS3   | 2.35                          | 3.57E-03 | 0.10 |
| NUDCD3   | 3.39                          | 3.57E-03 | 0.10 |
| PWP2     | 4.00                          | 3.58E-03 | 0.10 |
| SAE1     | 2.65                          | 3.59E-03 | 0.10 |
| HDAC11   | 4.19                          | 3.62E-03 | 0.10 |
| TMEM63A  | 3.52                          | 3.61E-03 | 0.10 |

**eTable 4. GO Terms: Biological Processes Enriched After THS Exposure**

| ID         | Description                                            | Gene Count | q-Value  |
|------------|--------------------------------------------------------|------------|----------|
| GO:0045333 | Cellular Respiration                                   | 15         | 2.39E-03 |
| GO:0022904 | Respiratory Electron Transport Chain                   | 11         | 2.84E-03 |
| GO:0042775 | Mitochondrial ATP Synthesis Coupled Electron Transport | 10         | 2.84E-03 |
| GO:0042773 | ATP Synthesis Coupled Electron Transport               | 10         | 2.84E-03 |
| GO:0022613 | Ribonucleoprotein Complex Biogenesis                   | 24         | 4.19E-03 |
| GO:0022900 | Electron Transport Chain                               | 13         | 6.97E-03 |
| GO:0006605 | Protein Targeting                                      | 21         | 6.97E-03 |
| GO:0006120 | Mitochondrial Electron Transport, NADH to Ubiquinone   | 7          | 6.97E-03 |
| GO:0034470 | ncRNA Processing                                       | 21         | 6.97E-03 |
| GO:0006119 | Oxidative Phosphorylation                              | 10         | 7.24E-03 |
| GO:0006364 | rRNA Processing                                        | 16         | 7.24E-03 |

**eTable 5. GO Terms: Cellular Components Enriched After THS Exposure**

| ID         | Description                                  | Gene Count | q-Value  |
|------------|----------------------------------------------|------------|----------|
| GO:0005743 | Mitochondrial Inner Membrane                 | 29         | 7.21E-06 |
| GO:0098798 | Mitochondrial Protein Complex                | 14         | 8.30E-05 |
| GO:0070469 | Respiratory Chain                            | 11         | 8.30E-05 |
| GO:0098800 | Inner Mitochondrial Membrane Protein Complex | 12         | 2.36E-04 |
| GO:0044455 | Mitochondrial Membrane Part                  | 15         | 2.77E-04 |
| GO:0098803 | Respiratory Chain Complex                    | 8          | 4.38E-03 |
| GO:1990204 | Oxidoreductase Complex                       | 9          | 4.76E-03 |
| GO:0005746 | Mitochondrial Respiratory Chain              | 8          | 5.60E-03 |
| GO:0005747 | Mitochondrial Respiratory Chain Complex I    | 6          | 5.60E-03 |
| GO:0030964 | NADH Dehydrogenase Complex                   | 6          | 5.60E-03 |
| GO:0045271 | Respiratory Chain Complex I                  | 6          | 5.60E-03 |
| GO:0044391 | Ribosomal Subunit                            | 12         | 5.60E-03 |
| GO:0015934 | Large Ribosomal Subunit                      | 9          | 8.75E-03 |

**eTable 6. GO Terms: Molecular Function Enriched After THS exposure**

| ID         | Description                 | Gene Count | q-Value  |
|------------|-----------------------------|------------|----------|
| GO:0003954 | NADH Dehydrogenase Activity | 7          | 3.80E-03 |

**eTable 7. Reactome Terms Enriched After THS exposure.**

| <b>ID</b>     | <b>Description</b>                                                                                                    | <b>Gene Count</b> | <b>q-Value</b> |
|---------------|-----------------------------------------------------------------------------------------------------------------------|-------------------|----------------|
| R-HSA-1428517 | The Citric Acid (TCA) Cycle and Respiratory Electron Transport                                                        | 14                | 9.27E-03       |
| R-HSA-611105  | Respiratory Electron Transport                                                                                        | 10                | 1.01E-02       |
| R-HSA-72766   | Translation                                                                                                           | 18                | 1.01E-02       |
| R-HSA-1268020 | Mitochondrial Protein Import                                                                                          | 8                 | 1.01E-02       |
| R-HSA-72165   | mRNA Splicing - Minor Pathway                                                                                         | 7                 | 1.05E-02       |
| R-HSA-5696398 | Nucleotide Excision Repair                                                                                            | 10                | 1.05E-02       |
| R-HSA-168273  | Influenza Viral RNA Transcription and Replication                                                                     | 11                | 1.05E-02       |
| R-HSA-73894   | DNA Repair                                                                                                            | 18                | 1.05E-02       |
| R-HSA-156827  | L13a-mediated Translational Silencing of Ceruloplasmin Expression                                                     | 10                | 1.05E-02       |
| R-HSA-72706   | GTP Hydrolysis and Joining of the 60S Ribosomal Subunit                                                               | 10                | 1.05E-02       |
| R-HSA-168255  | Influenza Life Cycle                                                                                                  | 11                | 1.23E-02       |
| R-HSA-72613   | Eukaryotic Translation Initiation                                                                                     | 10                | 1.23E-02       |
| R-HSA-72737   | Cap-dependent Translation Initiation                                                                                  | 10                | 1.23E-02       |
| R-HSA-446203  | Asparagine N-linked Glycosylation                                                                                     | 17                | 1.23E-02       |
| R-HSA-8868773 | rRNA Processing in the Nucleus and Cytosol                                                                            | 13                | 1.23E-02       |
| R-HSA-163200  | Respiratory Electron Transport, ATP Synthesis by Chemiosmotic Coupling, and Heat Production by Uncoupling Proteins.   | 10                | 1.23E-02       |
| R-HSA-72689   | Formation of a Pool of Free 40S Subunits                                                                              | 9                 | 1.36E-02       |
| R-HSA-72312   | rRNA Processing                                                                                                       | 13                | 1.69E-02       |
| R-HSA-168254  | Influenza Infection                                                                                                   | 11                | 1.69E-02       |
| R-HSA-6791226 | Major Pathway of rRNA Processing in the Nucleolus and Cytosol                                                         | 12                | 2.12E-02       |
| R-HSA-156842  | Eukaryotic Translation Elongation                                                                                     | 8                 | 2.80E-02       |
| R-HSA-6799198 | Complex I biogenesis                                                                                                  | 6                 | 3.27E-02       |
| R-HSA-5696394 | DNA Damage Recognition in GG-NER                                                                                      | 5                 | 3.51E-02       |
| R-HSA-203927  | MicroRNA (miRNA) biogenesis                                                                                           | 4                 | 3.61E-02       |
| R-HSA-446193  | Biosynthesis of the N-glycan Precursor (dolichol lipid-linked oligosaccharide, LLO) and Transfer to a Nascent Protein | 7                 | 3.61E-02       |

**eFigure 3. Diagram Showing the Cell Death Associated Genes that were Upregulated Following THS Exposure in the IPA Analysis.**

Blue dotted lines indicate inhibition of cell death and yellow dotted lines indicate inconsistent findings to the predicted inhibition of Cell Death (z-score = -3.03). Grey lines indicate insufficient information to make a prediction. IPA predicted subcellular location (extracellular, plasma membrane, cytoplasm or nuclear) of each gene is shown.

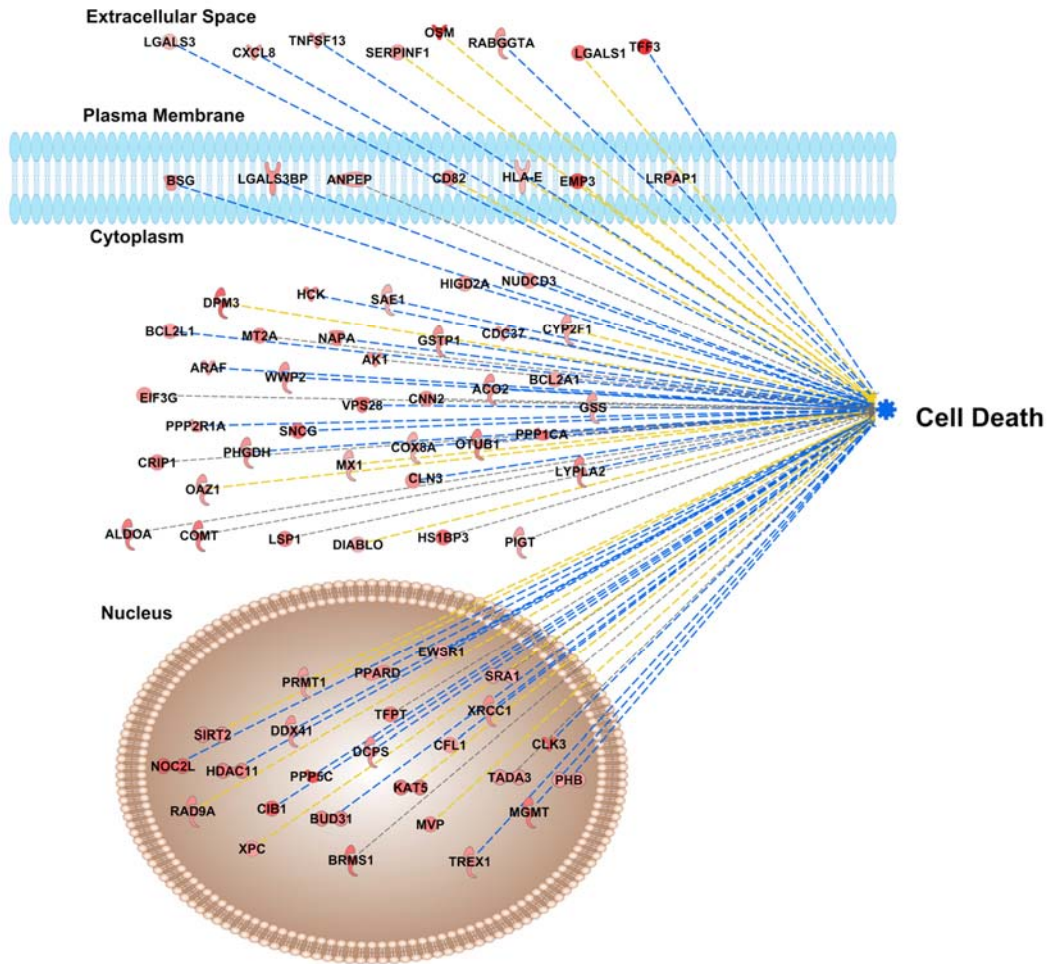

**eFigure 4. Diagram Showing the Cell Viability Genes that were Upregulated Following THS Exposure in the IPA Analysis.**

Orange dotted lines indicate activation of the process and yellow dotted lines indicate findings inconsistent with activation of cell viability (Z-score = 5.03). Predicted location of each gene (extracellular, plasma membrane, cytoplasm or nuclear) is shown.

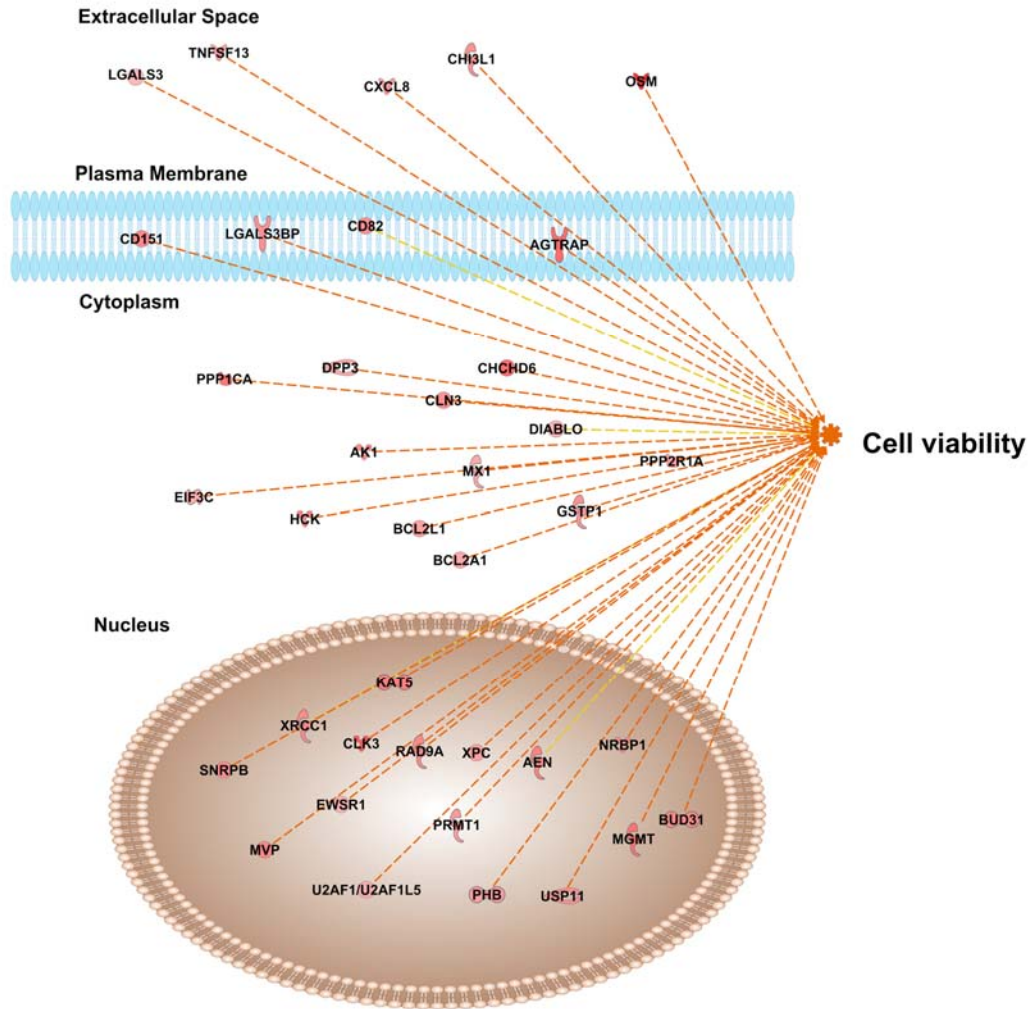

## eFigure 5. Diagram Showing the Homologous Recombination Genes that were Upregulated Following THS Exposure in the IPA Analysis.

Orange dotted lines indicate activation of the process (z-score = 2.83). IPA based subcellular predicted location (extracellular, plasma membrane, cytoplasm or nuclear) of each gene is shown in the diagram.

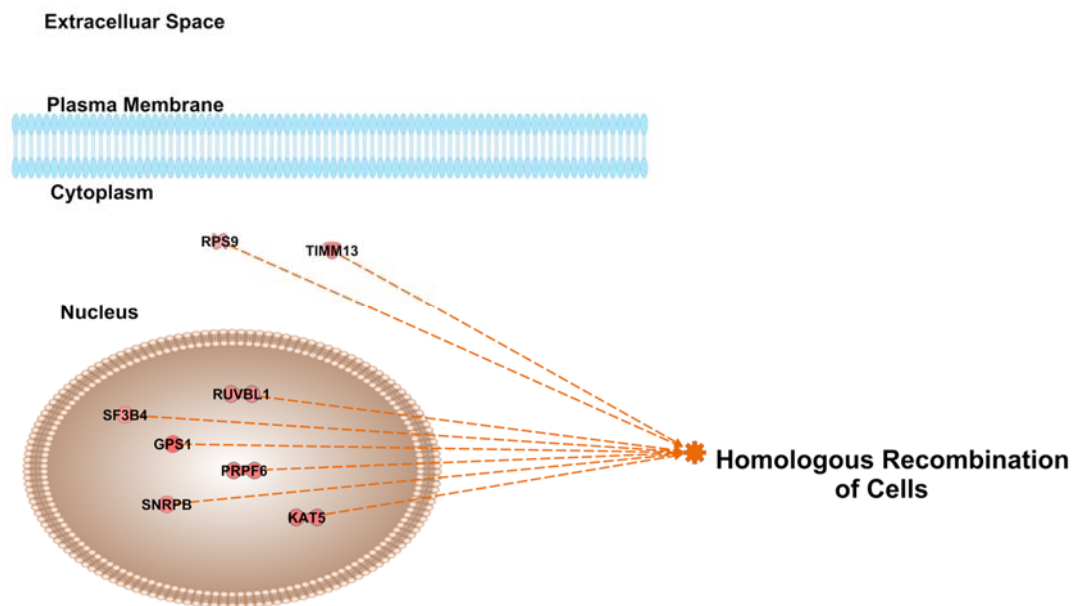

## eReferences

1. Schick SF, Farraro KF, Fang J, et al. An apparatus for generating aged cigarette smoke for controlled human exposure studies. *Aerosol Science and Technology*. 2012;46(11):1246–1255.doi:10.1080/02786826.2012.708947.
