# Supplementary material for: Experimental Acute Exposure to Thirdhand Smoke and Changes in the Human Nasal Epithelial Transcriptome: A Randomized Clinical Trial
Source: PubMed Central journal article supplement (PMC6604097; doi:10.1001/jamanetworkopen.2019.6362), 2019-06-28
Supplement: jamanetwopen-2-e196362-s003.pdf [file jamanetwopen-2-e196362-s003.pdf]

## Data Sharing Statement

Pozuelos GL, Kagda MS, Schick S, Girke T, Volz DC, Talbot P. Experimental acute exposure to thirdhand smoke and changes in the human nasal epithelial transcriptome: a randomized clinical trial. *JAMA Netw Open*. 2019;2(6):e196362. doi:10.1001/jamanetworkopen.2019.6362

### Data

**Data available:** Yes

**Data types:** Other (please specify)

**Additional Information:** RNA-seq data (fastq files) have been uploaded to SRA and GEO.

**How to access data:** The data have been deposited in NCBI's BioProject database and are available through the SRA accession number PRJNA514351 (<https://www.ncbi.nlm.nih.gov/sra/PRJNA514351>) and GEO accession GSE129959

**When available:** With publication

### Supporting Documents

**Document types:** None

### Additional Information

**Who can access the data:** Anyone requesting the data.

**Types of analyses:** For any purpose.

**Mechanisms of data availability:** NCBI's bio-project database. Data are will be available without the investigators consent.

**Any additional restrictions:** none
